# Supplementary material for: Spectrum of Genes for Non-GJB2-Related Non-Syndromic Hearing Loss in the Russian Population Revealed by a Targeted Deafness Gene Panel
Source: MDPI journal article supplement (doi:10.3390/ijms232415748), 2022-12-12
Supplement: s1 [file s1]

**Table S1.** The genotypes identified in this study among Russian patients carrying pathogenic or probably pathogenic gene variants.

| Gene   | Genotype       |                                | Effect            |                   | ClinVar ID, The ClinVar accession numbers <sup>6</sup> |                                        | Type of Inheritance | Number of Patients | Phenotype  |
|--------|----------------|--------------------------------|-------------------|-------------------|--------------------------------------------------------|----------------------------------------|---------------------|--------------------|------------|
|        | Allele 1       | Allele 2                       | Allele 1          | Allele 2          | Allele 1                                               | Allele 2                               |                     |                    |            |
| ADGRV1 | c.6610C>T      | c.10198C>T                     | p.Gln2204*        | p.Gln3400*        | this study, SCV002754430                               | this study, SCV002754431               | AR                  | 1                  | SN NSHL    |
| MYO15A | c.6046+1G>A    | c.8910del                      | splice            | p.Val2971fs*63    | VCV000164536                                           | this study, SCV002754432               | AR                  | 1                  | SN NSHL    |
| MYO7A  | c.1738_1745del | c.5573T>C                      | p.Val581Leufs*28  | p.Leu1858Pro      | this study, SCV002754433                               | VCV000043288                           | AR                  | 1                  | SN NSHL    |
| MYO7A  | c.2558G>A      | wt                             | p.Arg853His       | wt                | VCV000043186                                           | -                                      | AD                  | 1                  | SN NSHL    |
| MYO7A  | c.2557C>T      | wt                             | p.Arg853Cys       | wt                | VCV001333565                                           | -                                      | AD                  | 1                  | SN NSHL    |
| MYO7A  | c.3262C>T      | c.3893G>A                      | p.Gln1088*        | p.Gly1298Glu      | VCV000371695                                           | this study, SCV002754434               | AR                  | 1                  | SN NSHL    |
| MYO7A  | c.3612_3615del | c.4528G>A                      | p.Ser1205Argfs*26 | p.Glu1510Lys      | this study, SCV002754435                               | this study, SCV002754436               | AR                  | 1                  | SN NSHL    |
| OTOA   | c.562_569dup   | g.(?_21624041)_(21730798_?)del | p.Phe191fs*48     | del(OTOA)         | this study, SCV002754437                               | VCV000003561                           | AR                  | 1                  | SN NSHL    |
| OTOF   | c.2656del      | c.2656del                      | p.Val886Serfs*114 | p.Val886Serfs*114 | this study <sup>c</sup> , SCV002754438                 | this study <sup>c</sup> , SCV002754438 | AR                  | 1                  | SN NSHL+AN |
| OTOF   | c.4799+1G>A    | c.3192C>G                      | splice            | p.Tyr1064*        | VCV000164841                                           | SCV002754442                           | AR                  | 1                  | SN NSHL+AN |
| OTOF   | c.5169_5170del | c.4903A>T                      | p.Ile1724Leufs*19 | p.Arg1635*        | this study <sup>c</sup> , SCV002754439                 | this study <sup>c</sup> , SCV002754440 | AR                  | 1                  | SN NSHL+AN |
| OTOF   | c.4903A>T      | c.2214+5G>C                    | p.Arg1635*        | splice            | this study <sup>c</sup> ,                              | this study <sup>c</sup> ,              | AR                  | 1                  | SN         |

|                |                                    |                                     |                                |                                |                             |                                           |              |   |                               |
|----------------|------------------------------------|-------------------------------------|--------------------------------|--------------------------------|-----------------------------|-------------------------------------------|--------------|---|-------------------------------|
|                |                                    |                                     |                                |                                |                             | SCV002754440                              | SCV002754441 |   | NSHL+AN                       |
| <i>POU3F4</i>  | c.916C>T                           | -                                   | p.Gln306*                      | -                              | SCV002754444                | -                                         | XLR          | 1 | SN NSHL                       |
| <i>POU3F4</i>  | c.983A>G                           | -                                   | p.Asn328Ser                    | -                              | this study,<br>SCV002754443 | -                                         | XLR          | 1 | SN NSHL                       |
| <i>PTPRQ</i>   | c.1291C>T                          | c.2726del                           | p.Arg431*                      | p.Glu909Glyfs*15               | this study,<br>SCV002754445 | SCV002754446                              | AR           | 1 | SN NSHL                       |
| <i>SLC26A4</i> | c.85G>C                            | c.107A>C                            | p.Glu29Gln                     | p.His36Pro                     | VCV000004839                | this study,<br>SCV002754447               | AR           | 2 | SN<br>NSHL,SN<br>NSHL+EV<br>A |
| <i>SLC26A4</i> | c.1262A>G                          | c.107A>C                            | p.Gln421Arg                    | p.His36Pro                     | VCV000430229                | this study,<br>SCV002754447               | AR           | 1 | SN NSHL                       |
| <i>SLC26A4</i> | c.1001G>T                          | c.208C>T                            | p.Gly334Val<br>(splice)        | p.Pro70Ser                     | VCV000189039                | this study,<br>SCV002754448               | AR           | 1 | SN<br>NSHL+EV<br>A            |
| <i>SLC26A4</i> | c.1001G>T                          | c.1001G>T                           | p.Gly334Val, HC                | p.Gly334Val<br>(splice)        | VCV000189039                | VCV000189039                              | AR           | 1 | SN NSHL                       |
| <i>SLC26A4</i> | c.1229C>T                          | c.317C>A                            | p.Thr410Met                    | p.Ala106Asp                    | VCV000043498                | VCV001065204                              | AR           | 1 | SN<br>NSHL+EV<br>A            |
| <i>STRC</i>    | c.2171_2174del                     | g.(?_43890333)_<br>(43940887_?)del  | p.Val724Glyfs*6                | del(STRC-CKMT1B<br>- CATSPER2) | VCV000004344                | VCV000688049                              | AR           | 3 | SN NSHL                       |
| <i>STRC</i>    | c.2171_2174del                     | g.(?_43906612)_<br>(43906674_?)?del | p.Val724Glyfs*6                | delSTRC,ex5                    | VCV000004344                | this study <sup>c</sup> ,<br>SCV002754455 | AR           | 1 | SN NSHL                       |
| <i>STRC</i>    | g.(?_43890333)_<br>(43940887_?)del | g.(?_43890333)_<br>(43940887_?)del  | del(STRC-CKMT1B<br>- CATSPER2) | del(STRC-CKMT1B<br>- CATSPER2) | VCV000688049                | VCV000688049                              | AR           | 5 | SN NSHL                       |
| <i>STRC</i>    | g.(?_43890333)_<br>(43940887_?)del | g.(?_43890333)_<br>(43897714_?)del  | del(STRC-CKMT1B<br>- CATSPER2) | del(STRC-<br>CKMT1B)           | VCV000688049                | SCV002754456                              | AR           | 2 | SN NSHL                       |
| <i>STRC</i>    | g.(?_43890333)_<br>(43940887_?)del | g.(?_43890333)_<br>(43893072_?)del  | del(STRC-CKMT1B<br>- CATSPER2) | delSTRC,ex25                   | VCV000688049                | SCV002754457                              | AR           | 1 | SN NSHL                       |

|                    |                      |                                               |                   |                             |                                     |                                                      |    |   |         |
|--------------------|----------------------|-----------------------------------------------|-------------------|-----------------------------|-------------------------------------|------------------------------------------------------|----|---|---------|
| <i>STRC</i>        | c.4402C>T            | g.(?_43890333)_ (43940887_?)del               | p.Arg1468*        | del(STRC-CKMT1B - CATSPER2) | VCV000179758                        | VCV00068804<br>9                                     | AR | 1 | SN NSHL |
| <i>STRC</i>        | c.4057C>T            | g.(?_43890333)_ (43940887_?)del               | p.Gln1353*        | del(STRC-CKMT1B - CATSPER2) | VCV000242391                        | VCV00068804<br>9                                     | AR | 1 | SN NSHL |
| <i>TECTA</i>       | c.5597C>T            | wt                                            | p.Thr1866Met      | wt                          | VCV000236058                        | -                                                    | AD | 1 | SN NSHL |
| <i>TECTA</i>       | c.1756C>T            | <b>c.2458A&gt;T</b>                           | p.Arg586*         | <b>p.Lys820*</b>            | <b>VCV001704157</b>                 | <b>this study,<br/>SCV00275444<br/>9</b>             | AR | 1 | SN NSHL |
| <i>TMC1</i>        | <b>c.1750C&gt;T</b>  | c.1250G>A                                     | <b>p.Gln584*</b>  | p.Gly417Glu                 | <b>this study,<br/>SCV002754450</b> | SCV002754451                                         | AR | 1 | SN NSHL |
| <i>TMPRSS</i><br>3 | c.413C>A             | c.208del                                      | p.Ala138Glu       | p.His70fs*19                | VCV000046119                        | VCV00016549<br>2                                     | AR | 1 | SN NSHL |
| <i>TMPRSS</i><br>3 | c.310G>A             | c.46C>T                                       | p.Glu104Lys       | p.Arg16*                    | VCV000504522                        | VCV00121002<br>8                                     | AR | 1 | SN NSHL |
| <i>USH2A</i>       | c.11864G>A           | c.11864G>A                                    | p.Trp3955*        | p.Trp3955*                  | VCV000002357                        | VCV00000235<br>7                                     | AR | 2 | SN NSHL |
| <i>USH2A</i>       | c.11864G>A           | c.14365C>T                                    | p.Trp3955*        | p.Gln4789*                  | VCV000002357                        | VCV00081698<br>7                                     | AR | 1 | SN NSHL |
| <i>USH2A</i>       | c.11864G>A           | c.1606T>C                                     | p.Trp3955*        | p.Cys536Arg                 | VCV000002357                        | VCV00004847<br>1                                     | AR | 1 | SN NSHL |
| <i>USH2A</i>       | c.12234_12235de<br>1 | c.12234_12235del                              | p.Asn4079Trpfs*19 | p.Asn4079Trpfs*19           | VCV000096665                        | VCV00009666<br>5                                     | AR | 1 | SN NSHL |
| <i>USH2A</i>       | c.11864G>A           | g.(?_216270461)_<br>(216260162_?)del          | p.Trp3955*        | delUSH2A,ex22-24.           | VCV000002357                        | SCV002754454                                         | AR | 1 | SN NSHL |
| <i>USH2A</i>       | c.11864G>A           | <b>g.(?_216108034)_ (216108100_?)de<br/>1</b> | p.Trp3955*        | <b>delUSH2A,ex38</b>        | <b>VCV000002357</b>                 | <b>this study<sup>c</sup>,<br/>SCV00275445<br/>2</b> | AR | 1 | SN NSHL |
| <i>USH2A</i>       | c.2610C>A            | <b>g.<br/>(?_216462679)_ (216462739_?)del</b> | p.Cys870*         | <b>delUSH2A,ex11</b>        | <b>VCV000557167</b>                 | <b>this study<sup>c</sup>,<br/>SCV00275445<br/>3</b> | AR | 1 | SN NSHL |

Bold font indicates the variants identified for the first time; a—designations are given in accordance with the ACMG recommendations for the interpretation and classification of nucleotide sequence variants [21,22]; b—"VCV-" corresponds to the variant description identification numbers (ClinVarID) in the ClinVar database, —"SCV-" corresponds to the variant accession numbers in the ClinVar database; "rs-" in the dbSNP database; c—variants identified in the same patients are presented in the articles by Markova et al. and Lalayants et al. [14-16]; inheritance type:

---

AD—autosomal dominant; AR—autosomal recessive; XLR—X-linked recessive; SN NSHL—sensorineural NSHL; SN NSHL+EVA—SN NSHL with enlarged vestibular aqueduct; SN NSHL+AN—SN NSHL with auditory neuropathy.
